# Supplementary material for: Exercise therapy versus arthroscopic partial meniscectomy for degenerative meniscal tear in middle aged patients: randomised controlled trial with two year follow-up
Source: HighWire-hosted journal article supplement (doi:10.1136/bmj.i3740), 2016-07-20

## Supplementary appendix

### Figure S1.

Exercise therapy programme.

### Figure S2a-d.

Written postoperative instructions given to patients in the APM-group after surgery, at OUH (S2a-b) and MHH (S2c-d).

### Figure S3.

Flow-chart; Patient groups in ITT, AT and PP analyses.

### Figure S4.

Differences between groups in changes in KOOS<sub>4</sub>, the five KOOS<sub>subscales</sub> from baseline to 3- and 12-month follow-ups. Whiskers present 95 % CI.

### Table S1.

Patient-reported outcomes: Changes from baseline to 2 years; ITT, AT and PP analyses.

### Table S2.

Muscle strength and lower extremity performance tests: Changes from baseline to 3- and 12-month follow-up; ITT, AT and PP analyses.

### Supplementary paragraph: Crossovers.

In-depth description of KOOS<sub>4</sub> scores over time in the 13 patients crossing over from exercise therapy to arthroscopic partial meniscectomy.

### Figure S5.

Change in KOOS<sub>4</sub> from baseline to 3 months, from 3 months to 12 months and from 12 months to 2 years as a function of time for crossing over. Each diamond represents a single patient. Two subjects had multiple surgeries; one subject (red diamond) who crossed over at 4.7 months had a second arthroscopy at 10.2 months, and the first subject to crossover (green diamond) at 2.8 months had an osteotomy at 8.8 months and removal of plates at 23.5 months. The figures illustrates that there were no or low correlations between time to crossover and change in KOOS<sub>4</sub>.

**Figure S1.**  
**Exercise therapy programme.**

| Exercise                    | Description                                                                | Sets by Number of Repetitions | Figures                                                                               |
|-----------------------------|----------------------------------------------------------------------------|-------------------------------|---------------------------------------------------------------------------------------|
| Stationary cycle            | Continuous warm-up at preferred resistance                                 | 20 min                        |    |
| Squat                       | Maintain knee-over-toe position                                            | 3 x 10                        |    |
| Single-leg squat            | Maintain knee-over-toe position                                            | 3 x 10                        |   |
| Step-up                     | Maintain knee-over-toe position                                            | 3 x 10                        |  |
| Knee stability in pull loop | Maintain balance. With or without balance pad.                             | 3 x 10                        |  |
| Hamstring on Fitball        | Both feet on top off the ball. Lift back and pelvis. Pull ball towards you | 3 x 8                         |  |
| Single-leg leg press        | Start in 90° knee flexion                                                  | 2-4 x 15-6 (+2)†              |  |
| Single-leg knee extension   | Start in 90° knee flexion                                                  | 2-4 x 15-6 (+2)†              |  |

|                                                                                                                                                                                                                                                                                                                                                                                                                                                                                                                                                                                                                                                                                                                    |                                                                                                                                                                                                                       |                   |                                                                                     |
|--------------------------------------------------------------------------------------------------------------------------------------------------------------------------------------------------------------------------------------------------------------------------------------------------------------------------------------------------------------------------------------------------------------------------------------------------------------------------------------------------------------------------------------------------------------------------------------------------------------------------------------------------------------------------------------------------------------------|-----------------------------------------------------------------------------------------------------------------------------------------------------------------------------------------------------------------------|-------------------|-------------------------------------------------------------------------------------|
| Single-leg leg curl                                                                                                                                                                                                                                                                                                                                                                                                                                                                                                                                                                                                                                                                                                | Lift quickly up, then slowly down to full extension                                                                                                                                                                   | 2-4 x 15-6 (+2) † | 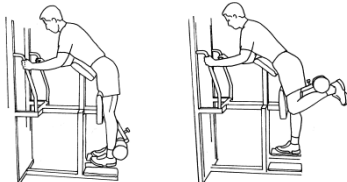 |
| Skating                                                                                                                                                                                                                                                                                                                                                                                                                                                                                                                                                                                                                                                                                                            | Start on one leg, hop sideways, perform a soft, deep and steady landing on one leg, hop back to the other side. Maintain knee-over-toe position                                                                       | 3 x 10            |  |
| Limping cross                                                                                                                                                                                                                                                                                                                                                                                                                                                                                                                                                                                                                                                                                                      | Stand in the middle of a cross on one leg. Hop straight forward and back to the centre, right and back to the centre, backwards and back to the centre, left and back to the centre. Maintain knee-over-toe position. | 3 x 3 rounds      |  |
| <p>*Minimum 2, maximum 3 training sessions per week, Progression based on increasing loads for the strengthening exercises, and changing the support surface or including other more challenging variations for the neuromuscular/plyometric exercises.</p> <p>†Initially, the participants performed 2 sets of 15 repetitions, then 3 sets of 12 repetitions, then 3 sets of 8 repetitions, then 4 sets of 6 repetitions at the end of the programme. The "plus-two rule" (+2) indicates that the last set should be performed with as many repetitions as possible, and if the participant is able to add at least 2 extra repetitions to the set, the load is to be increased at the next training session.</p> |                                                                                                                                                                                                                       |                   |                                                                                     |

*Text used with permission:* Journal of Orthopedic & Sports Physical Therapy

*Reference:* A 12-week exercise therapy program in middle-aged patients with degenerative meniscus tears: a case series with 1-year follow-up, published: 2012 Nov;42(11):919-31 (doi: 10.2519/jospt.2012.4165).

*Drawings used with permission:* Copyright © by ExorLive <http://exorlive.com/no>

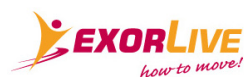

## Figure S2a-d.

Written postoperative instructions given to participants in the APM-group after surgery, at OUH (S2a-b) and MHH (S2c-d).

### Figure S2a.

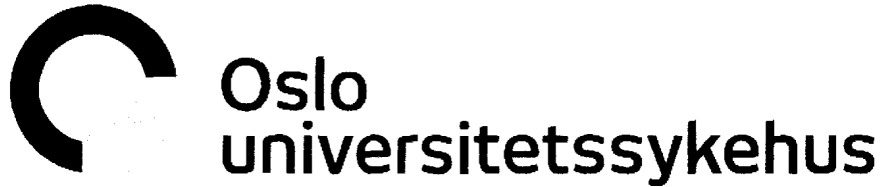

#### PASIENTINFORMASJON MENISKOPERASJON / ARTHROSCOPI I KNEE

Meniskene ligger som 2 støtdempende puter inne i kneet. Skade på menisken kan føre til plager i form av smerter, ustabilitet, stivhet og låsningstendens i kneet. Ved vedvarende plager kan det være aktuelt med et inngrep hvor deler av eller hele menisken fjernes.

Inngrepet utføres arthroscopisk gjennom 3 små innstikk. Et hull til "kikkerten", et til instrumentene og et til skylling med saltvannopløsning. Innstikkene blir ikke alltid sydd, men gror igjen av seg selv.

For å redusere hevelse og blødning blir det umiddelbart etter operasjonen lagt en stram elastisk bandasje fra foten til over kneet. Denne kan ligge på 1-2 dager, men bør tas av og legges på ny hvis den føles ubehagelig stram. Du bør ta det litt med ro operasjonsdagen og hvile med benet hevet og strakt mot underlaget for å holde hevelse og smerte til det minimale. Unngå fristelsen til å legge en pute under kneet. Kuldepakning rundt kneet anbefales å bruke flere ganger om dagen ettersom det kan ha en smertedempende effekt og i noe grad minke hevelse. Poser med frosne grønnsaker pakket inni et håndkle er fine å bruke som ispose.

Du kan starte med øvelsene som instruert alt første dag etter operasjonen. Aktivitetsnivået spesielt den første uken skal styres ut fra hvor mye hevelse og smerte du har. Det varierer fra person til person. Hovner kneet opp bør du tilpasse aktivitetsnivået og gjerne hvile med benet høyt i perioder. Hevelse vil hindre deg i å bevege kneet, og du blir fort stiv.

Bruk 2 krykker i ca. 1 uke med belastning inntil det smerte og hevelse tillater. Når du kan gå normalt uten å halte så kan du legge bort krykkene. Det er hevelsen og smerten som bestemmer hvor fort du kan belaste fullt. Prøv å gå så normalt som mulig fra første stund med strekk og bøy i kneet.

#### Lykke til!

Hilsen Fysioterapitjenesten  
Ortopedisk avdeling, Ullevål  
Oslo Universitetssykehus

SNU ARKET FOR ØVELSER

## Figure S2b.

### ØVELSER

Det er viktig å komme i gang med øvelser både for bevegeligheten i kneet og muskulatur. Trening bør starte så snart som mulig, det vil si dagen etter operasjon. Ankeløvelser kan du starte med en gang. Hensikten er å bedre sirkulasjonen i benet og få tilbake normal bevegelighet og styrke.

Øvelsene som beskrives under bør du gjøre 3-4 ganger om dagen med 10 repetisjoner. Husk at det er viktig å utføre øvelsene rolig og kontrollert.

#### Liggende på ryggen

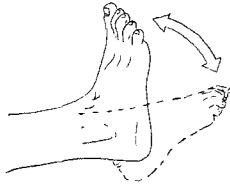

1. Bevege godt opp og ned i ankelen. Bøy og strekk gjerne tærne samtidig. Gjenta 10 ganger.

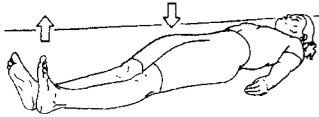

2. Ligg med strakt ben. Stram muskulaturen på forsiden av låret, - hold - slipp. 5 repetisjoner, gjenta 2 ganger.

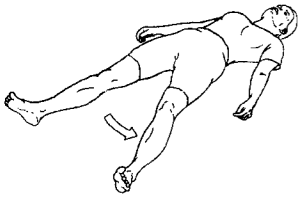

3. Ligg med benet strakt i sengen eller på gulvet. Sørg for glatt underlag. Stram muskulaturen og før hele benet strakt langs madrassen ut til siden og tilbake. Kontroller bevegelsen og ikke rykk til. Rolid og langsomt.

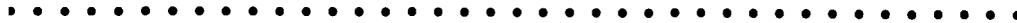

#### Sittende

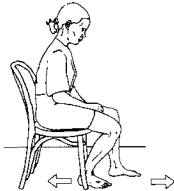

4. Sitt på sengekanten – eller på en høy stol - med begge fot sålene på gulvet. (glatt underlag). Skyv foten på det opererte benet frem og strekk i kneet. Før så helen bakover, og bøy i kneet så mye du greier. 10 repetisjoner, gjenta 2 ganger. Denne er for å bedre bevegeligheten i kne.

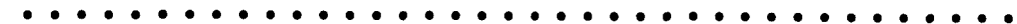

#### Stående

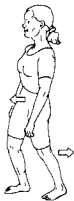

5. Stå med bena parallelle, og vekten på det uopererte benet. Bøy litt i operert ben, og strekk deretter helt ut i kneet ved å bruke muskulaturen på forsiden av låret. (Ikke sett ut baken!!) 10 repetisjoner, gjenta 2 ganger.
6. Stå med det opererte benet litt lenger bak enn det andre. Slipp hælen opp så du får en bøy i kneet, slapp av. Strekk så ut kneet og stram i låret.

Figure S2c.

|                    |                                                         |
|--------------------|---------------------------------------------------------|
| <b>MHH</b><br>1936 | <b>Martina Hansens Hospital</b><br>Dagkirurgisk seksjon |
|--------------------|---------------------------------------------------------|

## Treningskjema etter kneoperasjon

Etter at du er operert, er det viktig å komme i gang med øvelser for å gjenvinne normal funksjon så raskt som mulig.

### Belastning

Du kan øke belastningen/vektbæringen på kneet gradvis. Dette vurderes etter hvor mye smerte/hevelse som er i kneet. Den første uken etter operasjonen skal du ta pauser, med benet hvilende høyt. I forbindelse med hviling kan du f.eks gjøre øvelser.

Øker hevelsen den første uke, kan det bety at du har gått for mye eller sittet med benet ned for lenge av gangen.

Unngå pute under kneet om natten! Det er viktig at strekkeevnen opprettholdes i kneet.

### Krykkegange

Du skal bruke to krykker etter operasjonen. Krykkene skal brukes til kan gå normalt, dvs. uten å halte og så lenge du har hevelse og ubehag ved belastning.

### Hvordan gå med krykker?

Gangrytme: Begge krykkene frem

Operert ben plasseres mellom krykkene

Friskt ben går vanlig skritt forbi det opererte

Du skal gå så normalt som mulig, dvs. føre benet frem m/bøy i hofte og kne, lande på hælen, rulle over foten og sparke fra med tær/stortå

Hensikt: Avlaste kneet tilstrekkelig under tilheling

Opprettholde et normalt gangmønster

### Øvelsesark

Du kan starte med øvelsene fra den dagen du er operert. Hensikten er at du gradvis får opparbeidet full strekk og bøy i kneet samt gradvis får styrket lårmuskulaturen. Øvelsene kan gjerne gjøres 2-3 gr. daglig. Begynn med 4-6 repetisjoner av hver øvelse og øk gradvis til 10 - 12 repetisjoner. Når du ikke har hevelse i kneet lenger kan du gjøre øvelser med full vektbelastning (i stående stilling)

**Hvis det er noe du lurer på i forhold til opptreningen, ta kontakt med fysioterapiavdelingen 67 52 18 04**

Postadresse:  
Martina Hansens Hospital  
Postboks 23  
1306 Bærum Postterminal

Besøksadresse:  
Dønskiveien 8  
1346 Gjøttum

Telefon:  
67521750  
Telefax:

E-mail:  
postmottak@mh.no  
Web: www.mh.no

Figure S2d.

|                           |                                                         |
|---------------------------|---------------------------------------------------------|
| <b>MHH</b><br><b>1936</b> | <b>Martina Hansens Hospital</b><br>Dagkirurgisk seksjon |
|---------------------------|---------------------------------------------------------|

| ØVELSER/HENSIKT                                                                                                                                              | UTFØRSEL                                                                                                                                                 |  |  | Husk: Smerte og hevelse er styrende for hvor raskt du går frem. |
|--------------------------------------------------------------------------------------------------------------------------------------------------------------|----------------------------------------------------------------------------------------------------------------------------------------------------------|--|--|-----------------------------------------------------------------|
| <b>Hensikt:</b><br>Det er viktig å få normal strekk i kneet etter operasjonen. Dette er en forutsetning for god funksjon og vil lette videre rehabilitering. | Legg kneet regelmessig i strekk når du hviler. D.v.s du bygger opp under helen, slik at kneet henger fritt. Start med et par minutter og øke etterhvert. |  |  |                                                                 |
| <b>Rygliggende:</b> Pute under kneet<br><br><b>Hensikt:</b> Opptrening av fremre lårmuskulatur                                                               | Press knehasen ned i puten, løft hælen fra underlaget og strekk kneet helt ut. Senk benet rolig tilbake til utgangsstilling.                             |  |  |                                                                 |
| <b>Sideliggende på ikke operert side,</b> operert ben plassert i Lengderetningen av kroppen<br><br><b>Hensikt:</b> Styrke utside hofte                       | Løft benet rett opp uten å la det bevege seg forover. Hold det der 8-10 sek. Før du sakte legger det ned igjen                                           |  |  |                                                                 |
| <b>Sittende på sengekanten eller på høy stol med operert ben hengende</b><br><br><b>Hensikt:</b> Bevegelse i operert kne, samt styrketrening lårmuskulatur.  | Bøy operert kne helt inn, strekk operert kne helt ut.                                                                                                    |  |  |                                                                 |
| <b>Sitt på en stol med armlene med foten plassert på gulvet.</b><br><br><b>Hensikt:</b> Bevegelse i opererte kne.                                            | Ha foten i gulvet og skyv deg frem på stolen.                                                                                                            |  |  |                                                                 |
| <b>Stå oppreist med føttene plassert under hoftene, bøy knærne.</b><br>NB! Knærne skal peke fremover mot tærne<br><br><b>Hensikt:</b> Styrke bena            |                                                                                                                                                          |  |  |                                                                 |

Postadresse:  
 Martina Hansens Hospital  
 Postboks 23  
 1306 Bærum Postterminal

Besøksadresse:  
 Dønskiveien 8  
 1346 Gjettum

Telefon:  
 67521750  
 Telefax:

E-mail:  
 postmottak@mhh.no  
 Web: www.mhh.no

**Figure S3.**  
**Flow-chart; Participant groups in ITT, AT and PP analyses.**

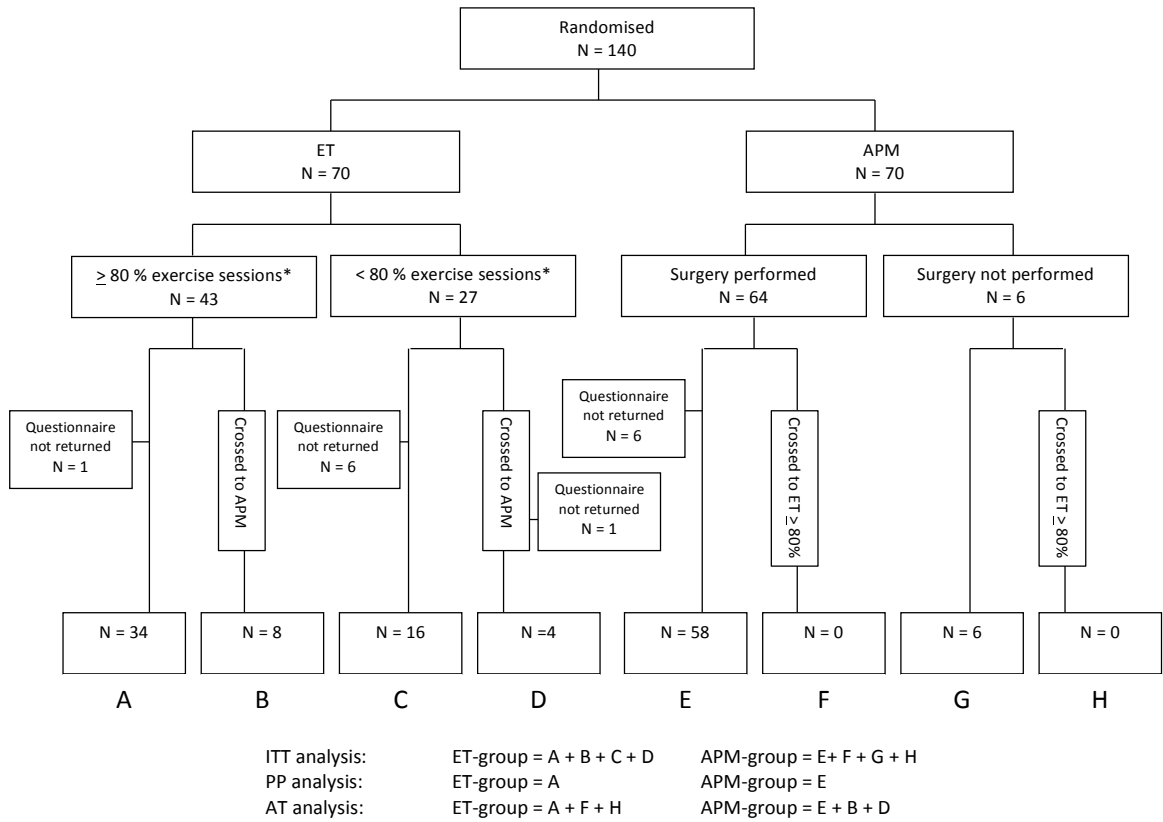

\*Supervised exercise therapy; Less than 80 % versus 80 % or more of the prescribed twice weekly sessions for 12 weeks (cut-off 19 sessions)



**Figure S4.**  
**Differences between groups in changes in KOOS<sub>4</sub>, the five KOOS<sub>subscales</sub> from baseline to 3- and 12-month follow-ups. Whiskers present 95 % CI.**

**KOOS at 3 months**

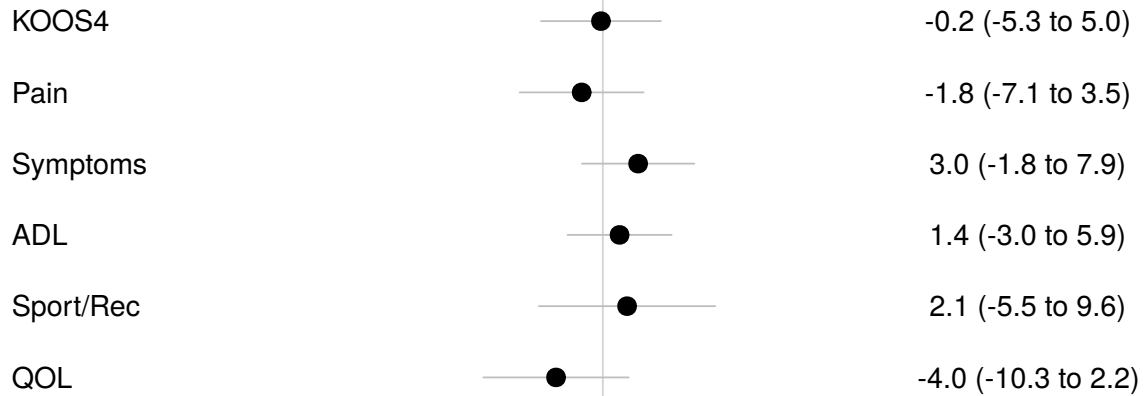

**KOOS at 12 months**

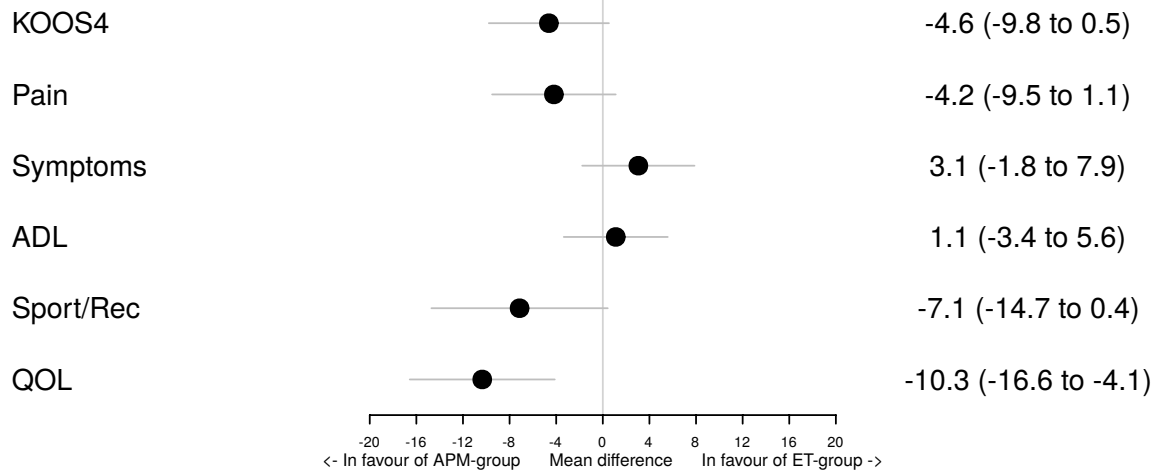

**Table S1.**  
**Patient-reported outcomes: Changes from baseline to 2 years; ITT, AT and PP analyses.**

| Outcome                            | Intention to treat analysis (ITT)              |             | Per protocol analysis (PP)                     |             | As treated analysis (AT)                       |             |
|------------------------------------|------------------------------------------------|-------------|------------------------------------------------|-------------|------------------------------------------------|-------------|
|                                    | Between-group difference*<br>Mean<br>(95 % CI) | P-value     | Between-group difference*<br>Mean<br>(95 % CI) | P-value     | Between-group difference*<br>Mean<br>(95 % CI) | P-value     |
| KOOS <sub>4</sub> , points         | 0.9<br>(-4.3 to 6.1)                           | 0.72        | 2.2<br>(-3.7 to 8.0)                           | 0.47        | 2.0<br>(-4.1 to 8.1)                           | 0.52        |
| KOOS <sub>Pain</sub> , points      | 1.4<br>(-3.9 to 6.8)                           | 0.60        | 3.5<br>(-2.4 to 9.4)                           | 0.24        | 3.2<br>(-3.1 to 9.5)                           | 0.32        |
| KOOS <sub>Symptoms</sub> , points  | 5.4<br>(0.5 to 10.2)                           | <b>0.03</b> | 7.0<br>(1.2 to 12.7)                           | <b>0.02</b> | 6.2<br>(0.4 to 12.0)                           | <b>0.04</b> |
| KOOS <sub>ADL</sub> , points       | 1.6<br>(-2.9 to 6.1)                           | 0.48        | 0.5<br>(-4.2 to 5.2)                           | 0.84        | -0.7<br>(-5.8 to 4.4)                          | 0.80        |
| KOOS <sub>Sport/Rec</sub> , points | -1.5<br>(-9.1 to 6.2)                          | 0.71        | -1.5<br>(-10.5 to 7.5)                         | 0.74        | -1.6<br>(-10.6 to 7.3)                         | 0.72        |
| KOOS <sub>QoL</sub> , points       | -1.8<br>(-8.1 to 4.5)                          | 0.58        | -0.54<br>(-8.0 to 6.97.0)                      | 0.88        | 0.0<br>(-7.7 to 7.7)                           | 1.00        |
| SF-36 PCS, points                  | -1.5<br>(-3.9 to 1.0)                          | 0.24        | -1.2<br>(-4.1 to 1.7)                          | 0.42        | -0.8<br>(-3.7 to 2.0)                          | 0.57        |
| SF-36 MCS, points                  | 1.2<br>(-1.4 to 3.7)                           | 0.38        | 0.1<br>(-3.2 to 3.0)                           | 0.96        | -0.1<br>(-3.1 to 2.8)                          | 0.93        |

\*Between-group differences: positive values: ET-group better scores than APM-group, negative values: APM-group better scores than ET-group.

**Table S2.****Muscle strength and lower extremity performance tests: Changes from baseline to 3- and 12-month follow-up; ITT, AT and PP analyses.**

|                                                                                                                 | Intention to treat analysis (ITT)              |                  | Per protocol analysis (PP)                     |                  | As treated analysis (AT)                       |                  |
|-----------------------------------------------------------------------------------------------------------------|------------------------------------------------|------------------|------------------------------------------------|------------------|------------------------------------------------|------------------|
| Outcome                                                                                                         | Between-group difference*<br>Mean<br>(95 % CI) | P-value          | Between-group difference*<br>Mean<br>(95 % CI) | P-value          | Between-group difference*<br>Mean<br>(95 % CI) | P-value          |
| <b>Changes in muscle strength and lower extremity performance tests from baseline to the 3-month follow-up</b>  |                                                |                  |                                                |                  |                                                |                  |
| Peak torque extension, Nm                                                                                       | 23.3<br>(14.7 to 31.9)                         | <b>&lt;0.001</b> | 30.4<br>(20.7 to 40.1)                         | <b>&lt;0.001</b> | 29.9<br>(20.3 to 39.5)                         | <b>&lt;0.001</b> |
| Total work extension, J                                                                                         | 110.4<br>(67.5 to 153.3)                       | <b>&lt;0.001</b> | 138.5<br>(91.0 to 186.0)                       | <b>&lt;0.001</b> | 132.5<br>(83.8 to 181.2)                       | <b>&lt;0.001</b> |
| Peak torque flexion, Nm                                                                                         | 7.8<br>(2.9 to 12.7)                           | <b>0.002</b>     | 10.8<br>(5.2 to 16.4)                          | <b>&lt;0.001</b> | 10.2<br>(4.7 to 15.7)                          | <b>&lt;0.001</b> |
| Total work flexion, J                                                                                           | 49.4<br>(16.0 to 82.9)                         | <b>0.004</b>     | 78.4<br>(41.4 to 115.4)                        | <b>&lt;0.001</b> | 72.3<br>(35.2 to 109.4)                        | <b>&lt;0.001</b> |
| One leg hop test, cm<br>(higher is better)                                                                      | 4.9<br>(-1.7 to 11.6)                          | 0.15             | 6.1<br>(-2.5 to 14.7)                          | 0.17             | 5.5<br>(2.7 to 13.6)                           | 0.19             |
| 6-metre timed hop test, sec<br>(lower is better)                                                                | 0.4<br>(0.1 to 0.7)                            | <b>0.02</b>      | 0.5<br>(0.0 to 0.9)                            | <b>0.04</b>      | 0.4<br>(0.0 to 0.8)                            | 0.06             |
| Knee bends 30 sec test, n<br>(higher is better)                                                                 | 1.5<br>(-1.2 to 4.1)                           | 0.29             | 2.9<br>(-0.1 to 5.9)                           | 0.06             | 3.7<br>(0.6 to 6.8)                            | <b>0.02</b>      |
| <b>Changes in muscle strength and lower extremity performance tests from baseline to the 12-month follow-up</b> |                                                |                  |                                                |                  |                                                |                  |
| Peak torque extension,                                                                                          | 9.4                                            | <b>0.03</b>      | 13.7                                           | <b>0.007</b>     | 16.7                                           | <b>&lt;0.001</b> |

| Nm                                               | (0.7 to 18.1)          |              | (3.9 to 23.6)           |              | (7.0 to 26.5)           |              |
|--------------------------------------------------|------------------------|--------------|-------------------------|--------------|-------------------------|--------------|
| Total work extension, J                          | 55.5<br>(12.3 to 98.6) | <b>0.01</b>  | 66.4<br>(18.2 to 114.7) | <b>0.007</b> | 76.2<br>(26.7 to 125.6) | <b>0.003</b> |
| Peak torque flexion, Nm                          | 7.0<br>(2.1 to 11.9)   | <b>0.005</b> | 8.3<br>(2.7 to 14.0)    | <b>0.004</b> | 8.2<br>(2.6 to 13.8)    | <b>0.004</b> |
| Total work flexion, J                            | 37.5<br>(3.8 to 71.1)  | <b>0.03</b>  | 58.7<br>(21.1 to 96.2)  | <b>0.003</b> | 58.8<br>(21.2 to 96.5)  | <b>0.003</b> |
| One leg hop test, cm<br>(higher is better)       | 0.1<br>(-6.7 to 6.9)   | 0.98         | 1.4<br>(-7.4 to 10.2)   | 0.76         | 1.9<br>(-6.5 to 10.2)   | 0.66         |
| 6 meter timed hop test, sec<br>(lower is better) | 0.4<br>(0.0 to 0.7)    | <b>0.04</b>  | 0.5<br>(0.1 to 1.0)     | <b>0.03</b>  | 0.5<br>(0.1 to 0.9)     | <b>0.03</b>  |
| Knee bends 30 sec test, n<br>(higher is better)  | -1.3<br>(-4.1 to 1.4)  | 0.33         | -0.2<br>(-3.3 to 2.9)   | 0.90         | 0.7<br>(-2.5 to 3.9)    | 0.66         |

\*Between-group differences: positive values: ET-group better scores than APM-group, negative values: APM-group better scores than ET-group.

## **Supplementary paragraph and Figure S5.**

### **Detailed description of KOOS<sub>4</sub> scores over time in the 13 participants crossing over from exercise therapy to arthroscopic partial meniscectomy**

The 13 participants, who crossed over from the ET-group to surgery, had on average a KOOS<sub>4</sub> score of 46.0 at baseline. This average is somewhat worse than for the total group (Baseline: ET group 54.3, APM group 59.6). Baseline scores among the 13 participants ranged from 23.9 to 67.9.

Out of the 13 participants, one participant did not attend the 3- and 12-month follow-ups and another participant did not return the 2-year questionnaire.

The first participant to cross over did so at 2.8 months, the last at 15.7 months and the other 11 participants at times about equally distributed between the 3- and 12-month follow-ups. Two participants had multiple surgeries: one participant who crossed over at 4.7 months had a second arthroscopy at 10.2 months, and the first participant to cross over at 2.8 months had an osteotomy at 8.8 months and removal of plate and screws at 23.5 months.

The changes in KOOS<sub>4</sub> for the two individuals with multiple surgeries at the different time points were: 0-3 months 4.4 and -6.5; 3-12 months 0.5 and -8.5; 12-24 months 60.0 and 47.8. These two both had surgery close to the 3- and 12-month time points when KOOS data were collected. The improvements in these two individuals from 12 to 24 months were the largest among all the cross-over participants.

For the other 11 participants who crossed over but only had one arthroscopy, the change from 0-3 months (prior to crossover) varied from -28.6 to +31.8. The change from 3-12 months varied from -11.7 to +32.3, and from 12-24 months from -18.6 to +23.4.

From 3-12 months, one out of 12 participants had a deterioration that was greater than 11.3 points considered representing a clinically important change in KOOS<sub>4</sub>, and 4 of the 12 participants had an improvement that was greater than 11.3 points.

From 12-24 months, one out of 12 participants had a deterioration that was greater than 11.3 points and 7 out of 12 participants reported an improvement that was greater than 11.3 points. 4 participants experienced no clinically important change.

There were no or low correlations between time to cross over and change in KOOS<sub>4</sub>.

When comparing the improvements in KOOS<sub>4</sub> from 12-month to 2-year follow-up reported by the 12 crossovers (including the 2 having had multiple surgeries) versus the group who remained in the ET group, there was no difference between groups (25.5 vs. 25.5, P=1.0).

**Figure S5.**

**Change in KOOS<sub>4</sub> from baseline to 3 months, from 3 months to 12 months and from 12 months to 2 years as a function of time for crossing over. Each diamond represents a single participant. Two participants had multiple surgeries; one participant (red diamond) who crossed-over at 4.7 months had a second arthroscopy at 10.2 months, and the first participant to cross-over (green diamond) at 2.8 months had an osteotomy at 8.8 months and removal of plates at 23.5 months. The figures illustrates that there were no or low correlations between time to cross-over and change in KOOS<sub>4</sub>.**

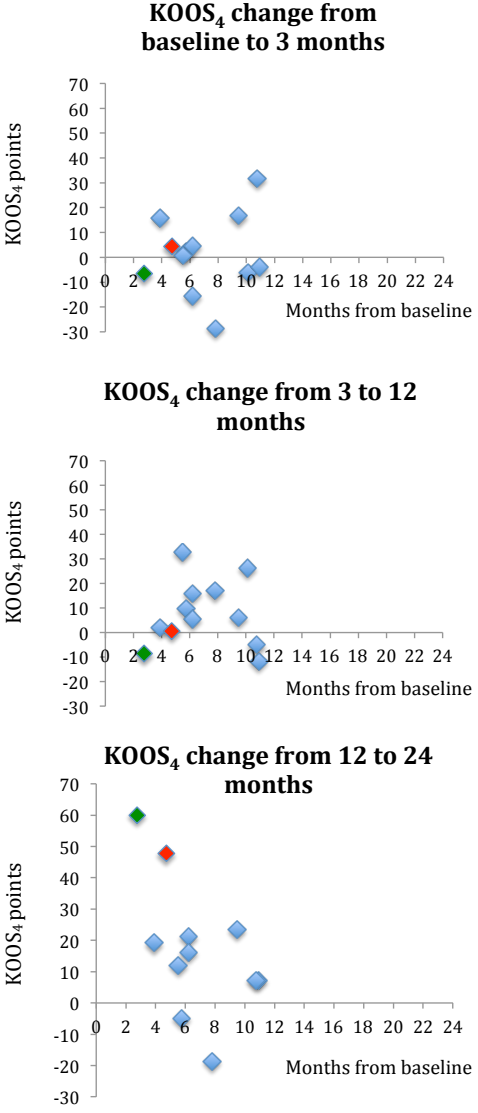

Supplement: kisn030744.ww1_default.pdf [file kisn030744.ww1_default.pdf]
